# Supplementary material for: Optimizing waste valorization: catalytic co-pyrolysis of cabbage waste and tire waste for enhanced bio-oil and syngas production utilizing char as a reforming catalyst
Source: Royal Society of Chemistry journal article supplement (doi:10.1039/d5ra03554f), 2025-01-01
Supplement: d5ra03554f1.pdf [file d5ra03554f1.pdf]

## SUPPORTING INFORMATION

### **Optimizing Waste Valorization: Catalytic Co-Pyrolysis of Cabbage Waste and Tire Waste for Enhanced Bio-Oil and Syngas Production Utilizing Char as a Reforming Catalyst**

**Mudassir Hussain Tahir<sup>a</sup>, Vikul Vasudev<sup>b</sup>, Muhammad Ibrahim<sup>c</sup>, Modhi O. Alotaibi<sup>d</sup>, Fatima M. Abbas<sup>e</sup>, Tahani A.Y. Asseri<sup>e</sup>, Rana Muhammad Irfan<sup>f</sup>**

<sup>a</sup>Co-Innovation Center of Efficient Processing and Utilization of Forest Resources, College of Materials Science and Engineering, Nanjing Forestry University, Nanjing, 210037, PR China.

<sup>b</sup>National-provincial joint engineering research center of biomaterials for Machinery Package, Nanjing Forestry University, Nanjing 210037, China

<sup>c</sup>Department of Environmental Sciences, Government College University Faisalabad (38000), Pakistan

<sup>d</sup>Department of Biology, College of Science, Princess Nourah bint Abdulrahman University, P.O. Box 84428, Riyadh, 11671, Saudi Arabia

<sup>e</sup>Applied College Dahrhan Al-Janoub, King Khalid University, Saudi Arabia

<sup>f</sup>Department of Pharmacy, shanghai jiao-tong university, China 200240

#### **Corresponding author**

Muhammad Ibrahim  
Department of Environmental Sciences,  
Government College University  
Faisalabad (38000), Pakistan  
Email: [kbrahimkhan693@gmail.com](mailto:kbrahimkhan693@gmail.com)

The formulas used to calculate the integral yield of the compound during TG-FTIR analysis are presented in Section 3.3.

2

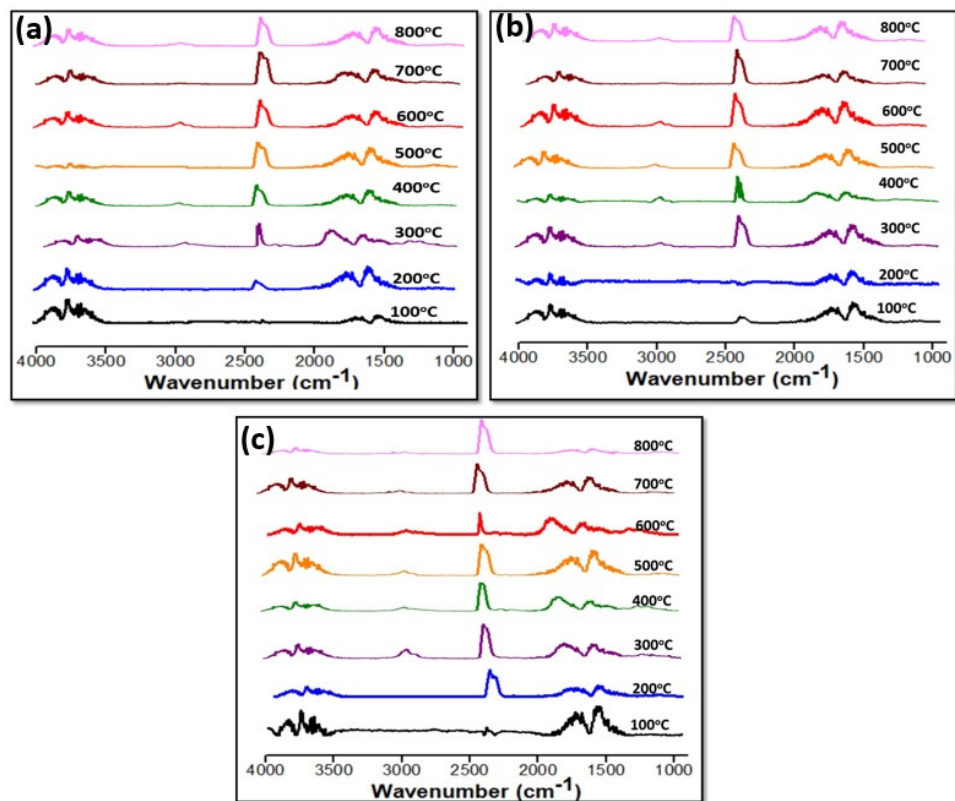

**Fig. S1.** FTIR spectra of volatiles released during (a) CW pyrolysis (b) co-pyrolysis and (c) catalytic co-pyrolysis

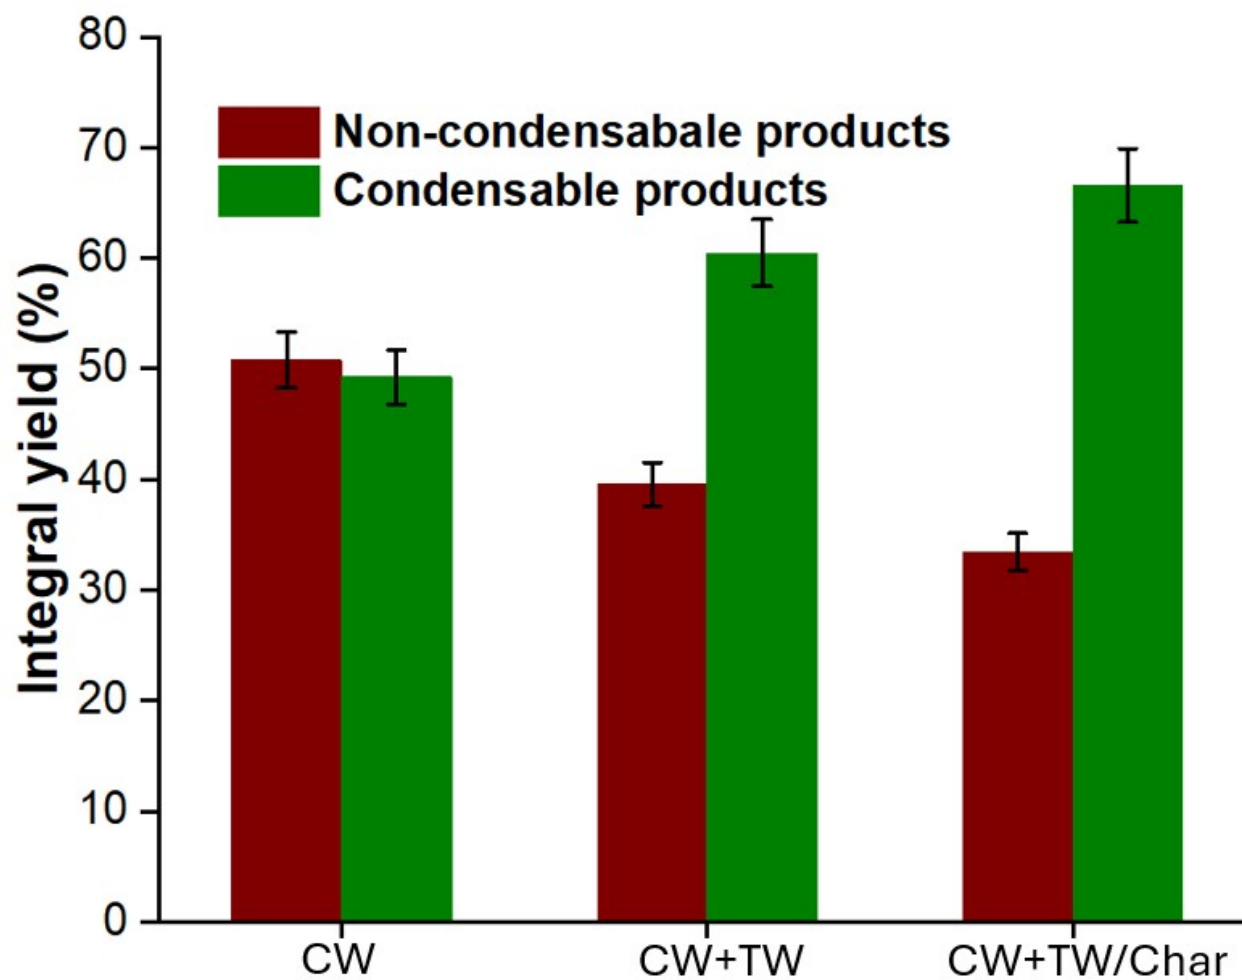

**Fig. S2.** Integral yield of condensable and non-condensable products of CW, co-pyrolysis with TW and catalytic pyrolysis with char at 500°C
